RESEARCH ARTICLE

# Impaired *M. tuberculosis* Antigen-Specific IFN- $\gamma$ Response without IL-17 Enhancement in Patients with Severe Cavitory Pulmonary Tuberculosis

Lin Fan<sup>1</sup>, Heping Xiao<sup>1</sup>, Guangliang Mai<sup>1</sup>, Bo Su<sup>2</sup>, Joel Ernst<sup>3\*</sup>, Zhongyi Hu<sup>1\*</sup>

**1** Clinic and Research Center of Tuberculosis, Shanghai Key Lab of Tuberculosis, Shanghai Pulmonary Hospital, Tongji University School of Medicine, 200433, Shanghai, China, **2** Central Laboratory, Shanghai Pulmonary Hospital, Tongji University School of Medicine, 200433, Shanghai, China, **3** Division of Infectious Diseases, New York University School of Medicine, New York, New York, United States of America

\* [joel.ernst@med.nyu.edu](mailto:joel.ernst@med.nyu.edu) (JE); [fanlinsj@aliyun.com](mailto:fanlinsj@aliyun.com) (ZH)

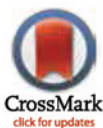

## Abstract

### OPEN ACCESS

**Citation:** Fan L, Xiao H, Mai G, Su B, Ernst J, Hu Z (2015) Impaired *M. tuberculosis* Antigen-Specific IFN- $\gamma$  Response without IL-17 Enhancement in Patients with Severe Cavitory Pulmonary Tuberculosis. PLoS ONE 10(5): e0127087. doi:10.1371/journal.pone.0127087

**Academic Editor:** Samithamby Jeyaseelan, Louisiana State University, UNITED STATES

**Received:** November 13, 2014

**Accepted:** April 11, 2015

**Published:** May 27, 2015

**Copyright:** © 2015 Fan et al. This is an open access article distributed under the terms of the [Creative Commons Attribution License](https://creativecommons.org/licenses/by/4.0/), which permits unrestricted use, distribution, and reproduction in any medium, provided the original author and source are credited.

**Data Availability Statement:** All relevant data are within the paper and its Supporting Information files.

**Funding:** This study was supported by the National Key Basic Research Program (973) sub-project in China (2012CB518706). The funders had no role in study design, data collection and analysis, decision to publish, or preparation of this manuscript.

**Competing Interests:** The authors have declared that no competing interests exist.

## Background

Th1 cells play an essential role in immune protection against tuberculosis. Th17 cells might be involved with immune pathology in active human tuberculosis (TB). The balance between Th1 and Th17 cells in patients with cavitory tuberculosis needs to be clarified which might help understanding the immunological basis of pathologic pathogenesis in TB.

## Method

Initially treated pulmonary TB (PTB) patients with or without cavities were recruited before chemotherapy. We isolated peripheral blood mononuclear cells, stimulated with phytohemagglutinin (PHA), PPD, or ESAT-6 antigens, and assayed supernatant IFN- $\gamma$  and IL-17 by ELISA after 24 or 72 hours incubation, respectively. Cells were also stained with antibodies to CD3, CD4, CD8, IFN- $\gamma$  or IL-17 and the proportion of stained cells was measured by flow cytometry.

## Results

We found wide variation of IFN- $\gamma$  response in active PTB patients, but less subject-to-subject variation of IL-17 was observed as we previously reported. There were no significant differences in IFN- $\gamma$  and IL-17 between cavitory and non-cavitory PTB; however, we found decreased IFN- $\gamma$  secretion in severe cavitory PTB compared to mild lesion non-cavitory PTB ( $p < 0.05$ ). We also found a decrease in the proportion of CD3+CD4+ T cells in the blood of severe cavitory PTB patients ( $p < 0.05$ ).

## Conclusions

IL-17 seemed to have no association with the formation of cavities in active PTB from the study of PBMC. Impaired IFN- $\gamma$  without IL-17 enhancement occurs in peripheral blood during severe cavitory PTB. Our results demonstrate that *M. tuberculosis* antigen-specific Th1 response is decreased when PTB lesions develop to severe cavities.

## Introduction

Tuberculosis (TB) ranks as the second leading cause of death from the infectious diseases worldwide, there were 8.6 million new TB cases in 2012 as reported [1]. The bacterium can remain latent in the host, turn into active TB, or the pathogens can be eradicated through the interaction of the host's immune system with *M. tuberculosis* [2]. Adaptive immune responses mediated by CD4+ T cells play a critical role in controlling the progress of *M. tuberculosis* infection, as HIV/AIDS patients whose CD4+ T cells are deficient are more susceptible to *M. tuberculosis* (MTB) infection than are HIV-uninfected individuals [3,4]. Moreover, the incidence of active tuberculosis in HIV-infected individuals is inversely proportional to the number of CD4 T cells in their peripheral blood [5, 6].

In addition to the roles of CD4+ T cells in immune protection against tuberculosis in humans, *M. tuberculosis* antigen-specific CD4+ T cells may contribute to immunopathology in the lungs and other organs [7,8]. Studies have demonstrated that in HIV-infected patients with active tuberculosis, the frequency of cavitory lung lesions is directly proportional to the number of peripheral blood CD4 T cells at the time of TB diagnosis [9]. One study revealed that a predominant Th1 immune response had been observed in non-cavitory tuberculosis patients while cavitory-involved segments of the lungs accumulated Th2 CD4+ T cell subsets [10]. Another study showed that neutrophils were predominant in the bronchoalveolar lavage fluid of cavitory lesions of tuberculosis [11], which is one of several potential pathogenic mechanisms including a dominant Th17 response [12].

Th17 cells, a relatively newly-described subset of CD4+ T cells, are implicated in host defense and in autoimmunity. IL-23 or IL-6, in combination with IL-1 $\beta$ , can efficiently induce IL-17 production in naive precursors, independently of TGF- $\beta$  [13]. Recent studies showed that IL-17 contributes to both immune protection and immune pathology of tuberculosis [14, 15]. Some studies had showed that antigen specific IL-17 was involved with immune pathology in MTB infection. One study found that IL-17A is involved in the formation of mature granuloma in the Mycobacterium bovis bacille Calmette-Guérin (BCG)-infected lung [16]. Another study reported that MTB antigen-specific, IL-17-mediated neutrophil recruitment was directly related to increased pathological damage in the lung and enhanced pathological consequences are associated with an IL-17-dominated response and increased tissue involvement [17]. IFN- $\gamma$ , mainly produced by CD4+ T cells, plays a critical role in resistance to tuberculosis and is necessary for host survival and optimal long-term protection against *M. tuberculosis* [18,19,20].

Our previous study showed that the variation of *M. tuberculosis* antigen-specific IFN- $\gamma$  and IFN- $\gamma$  /IL-17 exceeds that of responses to the polyclonal stimulus PHA in TST positive healthy humans, implying a variation of IFN- $\gamma$  /IL-17 might be associated with outcome of infection in patients with active PTB [21]. Cavity is one of the common tuberculous lesions in lungs which can develop from caseating granulomas [22]. Therefore, we hypothesized that there exists an imbalance of Th1/Th17 in cavitory PTB: IL-17 might participate in the formation of pulmonary cavities in tuberculosis; immune protection might decrease while immune pathology

increases in cavitory tuberculosis; and Th1/Th17 in cavitory PTB might be lower than in non-cavitory PTB. To determine our hypothesis, we quantified *M. tuberculosis* antigen-specific IFN- $\gamma$  and IL-17 in peripheral blood and stained PBMCs with anti-human T cell antibody in patients with active PTB, looking for an association between cavity formation and Th1/Th17 response by T cells.

## Materials and Methods

### Study population

Subjects were recruited from patients hospitalized at Unit 1 in the Department of Tuberculosis, Shanghai Pulmonary Hospital between July 1, 2012 and December 31, 2013. Patients were included in the study if they fulfilled all the following criteria: (1) diagnosed as newly treated active PTB confirmed by bacteriology, with all information regarding bacteriology, pathology, typical radiological manifestation and clinical response to anti-tuberculosis treatment available; (2) Tuberculous cavity or non-cavitory lesions in lungs could be observed on chest CT scan; (3) patients had never been treated for TB or treatment duration was within one week; and (4) subjects provided informed consent for the study. During the same period, healthy volunteers were recruited for the control group. All procedures were performed in accord with the protocol, and this study was confirmed to be approved by the Ethics Committee of Shanghai Pulmonary Hospital (IRB number 2012017) which is the name of institutional review board in the hospital, written informed consent was obtained from all participants who signed and agreed to participate in this study.

All information regarding characteristics of thoracic radiology (diameter in cavity, number and location of cavities, symptoms, complications, history of BCG vaccination, disseminated extrapulmonary tuberculosis) was carefully recorded.

### Isolation of PBMC and cell culture assays

Venous blood samples (10 mL) were collected in heparin tubes; PBMC (peripheral blood mononuclear cells) were isolated within 3 hours after blood collection. PBMC isolation was performed by density gradient centrifugation using Ficoll-Hypaque (Axis-shield) following the manufacturer's instructions. After washing the cells,  $3 \times 10^5$  cells per well were cultured in 200  $\mu$ L medium of RPMI-1640 (GIBCO, Invitrogen) with 10% human serum, penicillin (50 U/mL), streptomycin (50  $\mu$ g/mL), 2 mM L-glutamine and 10 mM HEPES using 96-well round-bottom plates (Costar). PBMC were then stimulated with PHA (phytohemagglutinin, a nonspecific T cell stimulus; 5  $\mu$ g/ml), PPD (purified protein derivative, 5  $\mu$ g/mL, Statens Serum Institute, Denmark), recombinant ESAT-6 (early secreted antigenic target, 6 kDa of *M. tuberculosis*; 10  $\mu$ g/mL), or medium alone as a negative control. ESAT-6 was recombinant and kindly provided by the Shanghai Institute of Immunology, Shanghai JiaoTong University School of Medicine.

### Cell staining and flow cytometry

PBMC were incubated with PPD, ESAT-6, PHA or medium alone at 37°C in 5% CO<sub>2</sub> for 72 hours. Brefeldin A (eBioscience, BFA, final working concentration 3 $\mu$ L/mL) was added to the cells 4 hours before staining. Antibodies were prepared, cells transferred to tubes then spun down at 750 g for 5 minutes at 4°C and washed once in 500  $\mu$ L FACS buffer. Samples were re-suspended in 100  $\mu$ L of diluted antibody against human cell-surface markers (CD4-PerCP-Cy5.5 (eBioscience, USA), CD8-PE/CYTM7 (BD, USA), or CD3-ECD (Beckman Coulter, France)), incubated for 30 minutes at 4°C, and washed twice in 500  $\mu$ L FACS buffer. Supernatants were removed and cells were resuspended in 100  $\mu$ L of Cytofix/Cytoperm (BD, USA), then incubated 20

**Table 1. Demographic Characteristics of 93 PTB patients.**

| Characteristic                             | Groups (PTB)      |                   | P value |
|--------------------------------------------|-------------------|-------------------|---------|
|                                            | Cavitory          | Non-cavitory      |         |
|                                            | 52(%)             | 41(%)             |         |
| sex (male)                                 | 35(67.3)          | 26(63.4)          | 0.69    |
| age                                        | 41.17 $\pm$ 17.11 | 39.93 $\pm$ 17.37 | 0.23    |
| extrapulmonary tuberculosis                | 8(15.4)           | 8(19.5)           | 0.60    |
| pleural tuberculosis                       | 2                 | 3                 |         |
| bronchial tuberculosis                     | 4                 | 4                 |         |
| intestinal tuberculosis                    | 1                 | 0                 |         |
| laryngeal tuberculosis                     | 1                 | 0                 |         |
| tuberculous meningitis                     | 0                 | 1                 |         |
| Diabetes                                   | 9(17.3)           | 2(4.9)            | 0.07    |
| Lesions $\geq$ 4 lung fields               | 22(42.3)          | 11(26.8)          | 0.12    |
| Other complications (COPD, bronchiectasis) | 3(5.8)            | 3(7.3)            | 0.76    |
| history of BCG vaccination                 | 48(92.3%)         | 36(87.8%)         | 0.47    |

doi:10.1371/journal.pone.0127087.t001

minutes at 4°C. After washing cells, cells were suspended in diluted intracellular antibodies (PE-IL-17 (BD,USA), Alexa Fluor-IFN- $\gamma$  (BD,USA), PE-isotype (BD,USA) or Alexa Fluor-isotype (BD,USA)), incubated 30 minutes at 4°C, then washed in 500uL 1X Perm Wash and resuspended in 100 uL of 1% paraformaldehyde. Data were collected using a BECKMAN COULTER Cytomics FC 500 Flow Cytometry System and analyzed with CXP software.

### Cytokine analyses in culture supernatants by ELISA

Cells were cultured and stimulated with the aforementioned antigens and controls for 24 hours (for IFN- $\gamma$  responses) or 72 hours (for IL-17 responses) at 37°C in 5% CO<sub>2</sub>. Supernatants were collected and stored at -70°C until the time of assay. The concentration of IFN- $\gamma$  was determined using the Human IFN- $\gamma$  ELISA Set (eBiosciences, USA), after diluting the supernatants sufficiently to yield results within the linear range of the assay (routine dilutions were: PHA-stimulated samples, 1:5–1:100; PPD, 1:5–1:10) Supernatants from negative controls or ESAT-6 stimulated samples were not diluted. IL-17 concentrations in supernatants were quantified using the Human IL-17 ELISA Set (eBioscience, USA) with 72 hours of incubation. Supernatants from PHA-stimulated samples were diluted 1:2; all other assays were performed on undiluted supernatants. All assays were done in duplicate. Plates were read at 450 nm within 30 minutes of the end of the assay, using an ELISA plate reader.

### Statistical analyses

Differences between two groups were calculated by the unpaired, two tailed student's t-test using Prism 5.01 software. The graph of severity grade of cavitory pulmonary tuberculosis was performed by statistical software SPSS 16.0. Values of p < 0.05 were considered statistically significant.

## Results

### Patient population

A total of 110 participants including 93 newly treated patients with PTB and 17 healthy control volunteers joined this study. All patients had their diagnoses confirmed by bacterial culture. 52

patients had cavitory lesions on chest CT scanning. Mean age in the cavitory group was  $41.2 \pm 17.1$  while that in the non-cavitory group was  $39.9 \pm 17.4$ . No significant differences existed regarding age, sex, frequency of diabetes, history of BCG vaccination and other complications between the two groups.

Among 17 healthy volunteers, the mean age was  $31.1 \pm 5.6$ . Five were excluded from healthy donors analysis due to their latent TB infection, given that their PBMC produced high levels of IFN- $\gamma$  in response to ESAT-6 and positive TST skin test (Tuberculin Skin Test). We separated the data of five people as latent TB infection group. The data are shown in [Table 1](#).

### Similar levels, but large variation of IFN- $\gamma$ responses in cavitory PTB and non-cavitory PTB

Among 93 patients with active PTB including both the cavitory and non-cavitory groups, we observed large variation in IFN- $\gamma$  responses stimulated by PHA, PPD, ESAT-6 or unstimulated

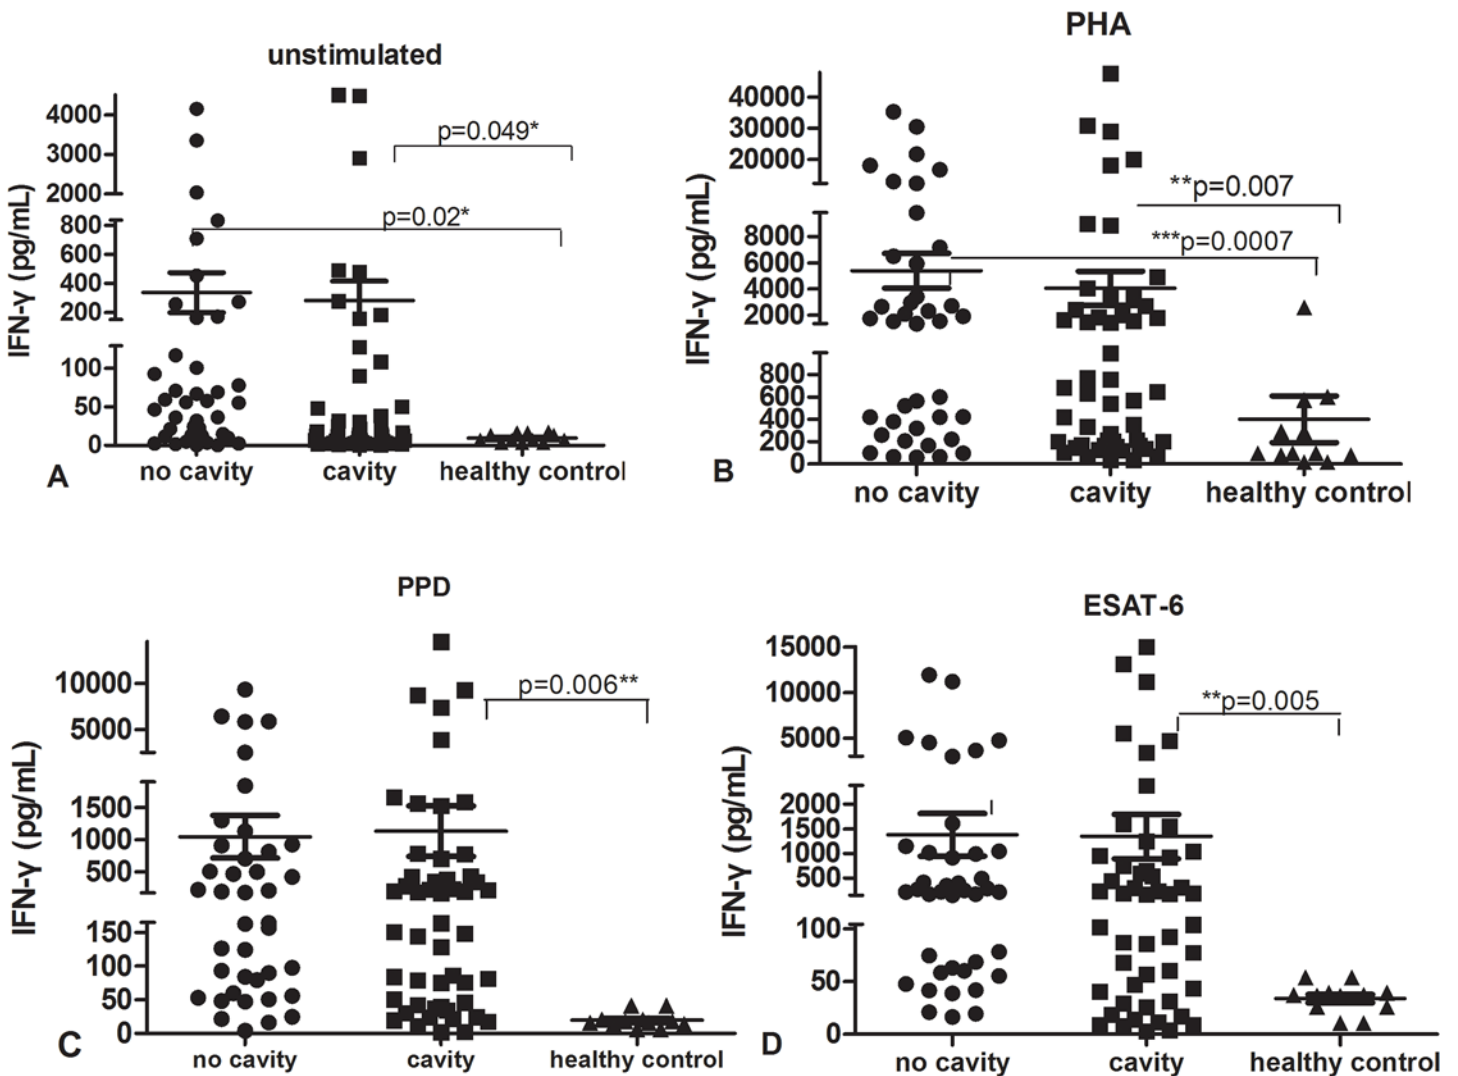

**Fig 1.** IFN- $\gamma$  secretion by ELISA in supernatant of PBMC stimulated with medium (unstimulated, A), PHA(B), PPD(C) or ESAT-6(D). p value refers to comparison of IFN- $\gamma$  levels.

doi:10.1371/journal.pone.0127087.g001

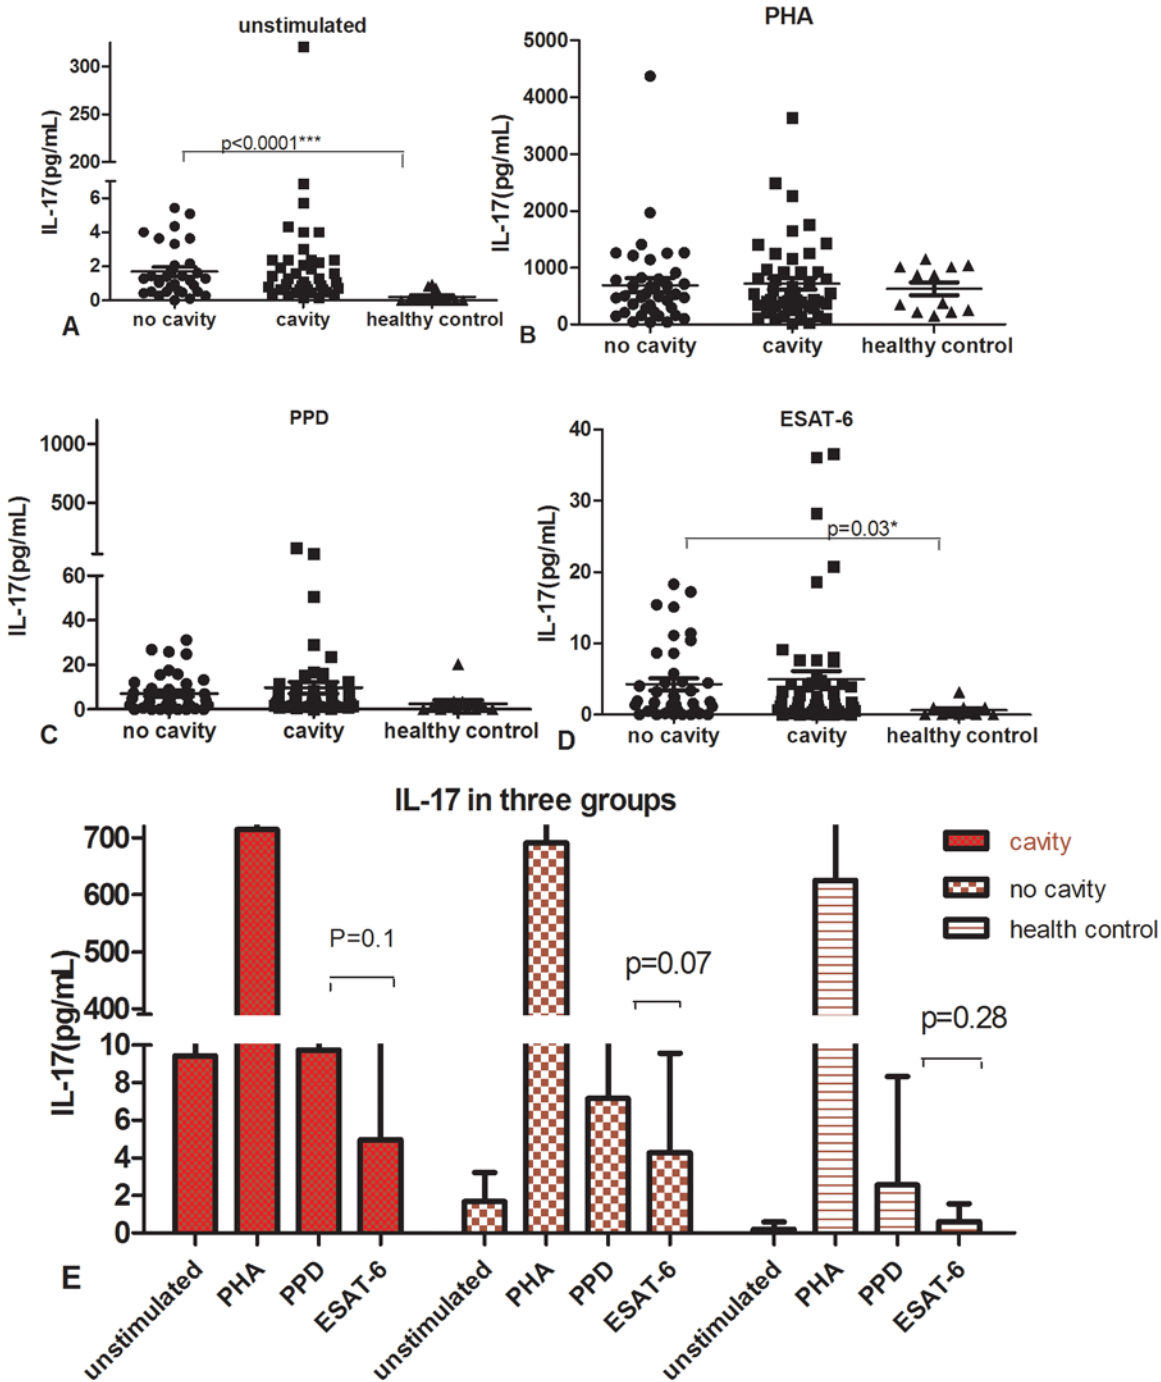

**Fig 2. Shown in scatter diagram: IL-17 secretion tested by ELISA in supernatant of PBMC stimulated with medium (unstimulated, A), PHA (B), PPD (C) and ESAT-6(D).** There were no statistic differences of IL-17 between cavitory and non-cavitory PTB. Fig 2E was showed in histogram: IL-17 secretion in response to different stimuli among patients with cavity, no cavity and healthy controls.

doi:10.1371/journal.pone.0127087.g002

control in both active PTB groups (Fig 1). As in our previous study, the degree of variation in IFN- $\gamma$  responses to any of the stimuli in PBMCs from patients with active PTB was significantly higher than in those of healthy controls. For example, PPD stimulated IFN- $\gamma$  secretion ranged from 14540 pg/mL to 2.31 pg/mL in cavitory PTB and from 9353 pg/mL to 3.89 pg/mL in

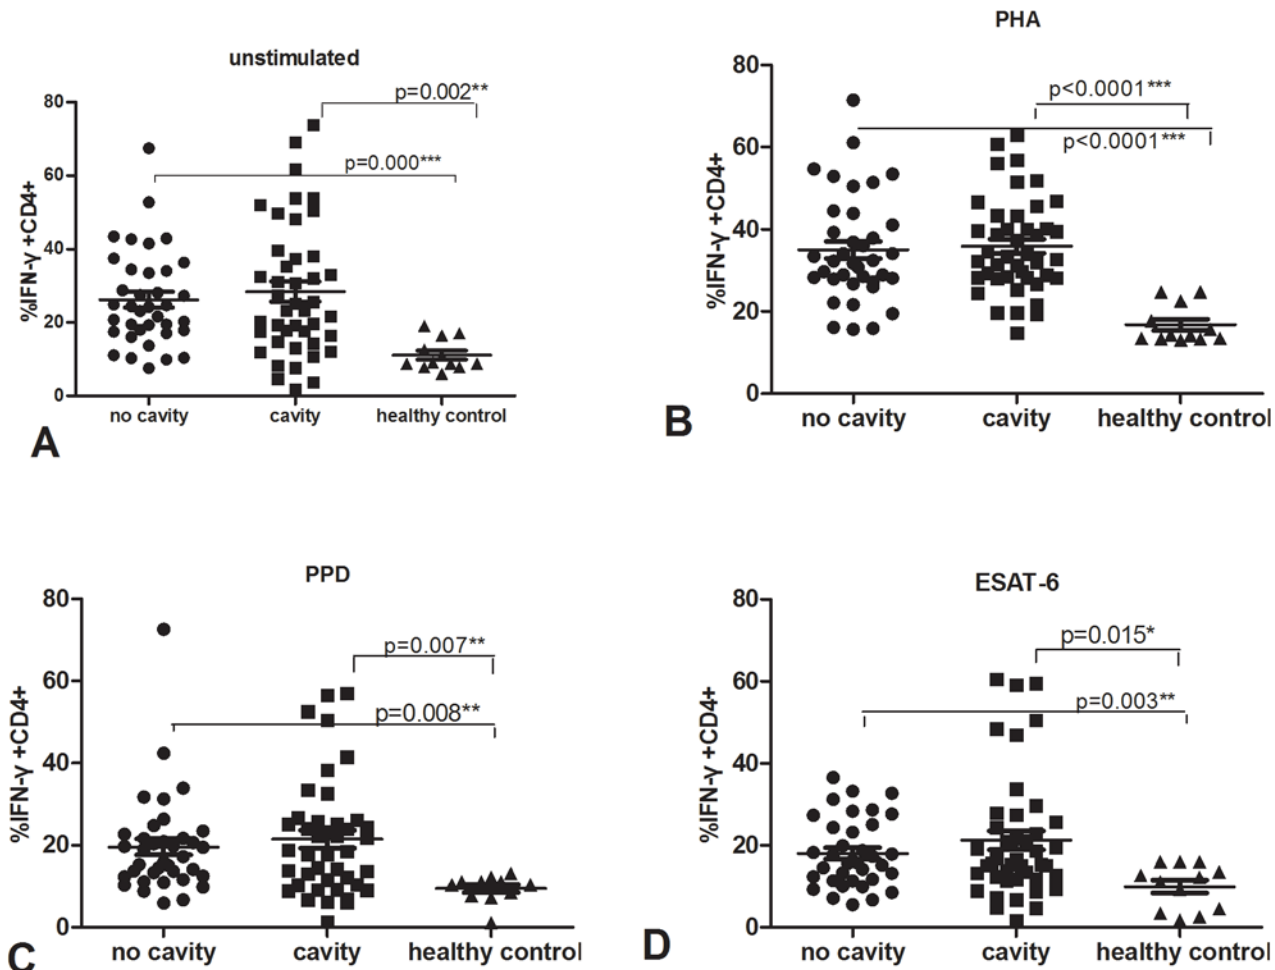

**Fig 3. Percentage of IFN- $\gamma$  secreting CD4+ T cells among cavitory and non-cavitory PTB as well as healthy controls, using cell staining and flow cytometry.** PBMC cultured with unstimulated (A), PHA(B), PPD(C) and ESAT-6(D).

doi:10.1371/journal.pone.0127087.g003

non-cavitory PTB, and ESAT-6 stimulated IFN- $\gamma$  varied over 700-5614-fold range, from 2.68 pg/mL to 15040 pg/mL in cavitory PTB and from 16.32 pg/mL to 11950 pg/mL in non-cavitory PTB. The variation of IFN- $\gamma$  secretion was similar between cavitory and non-cavitory PTB.

The mean levels of IFN- $\gamma$  in supernatants of PBMC stimulated with any of the stimuli, and in unstimulated cells, were also similar between the cavitory and non-cavitory PTB groups. However, the IFN- $\gamma$  level in supernatant from healthy controls was significantly lower than that in either group with active PTB ( $p < 0.05$ ) except that in response to PPD and ESAT-6 from no cavity vs healthy control did not get statistic differences ( $p > 0.05$ ), it might result from limited number of healthy control group.

### Similar levels and variation of IL-17 secretion between cavitory and non-cavitory PTB

IL-17 secretion between cavitory and non-cavitory PTB groups was similar,  $p > 0.05$ . In addition, we found that a wide range of IL-17 secretion existed in both active PTB groups but less variation as IFN- $\gamma$  had. IL-17 ranged 1-350-fold in cavitory PTB and 1-110-fold in non-cavitory PTB.

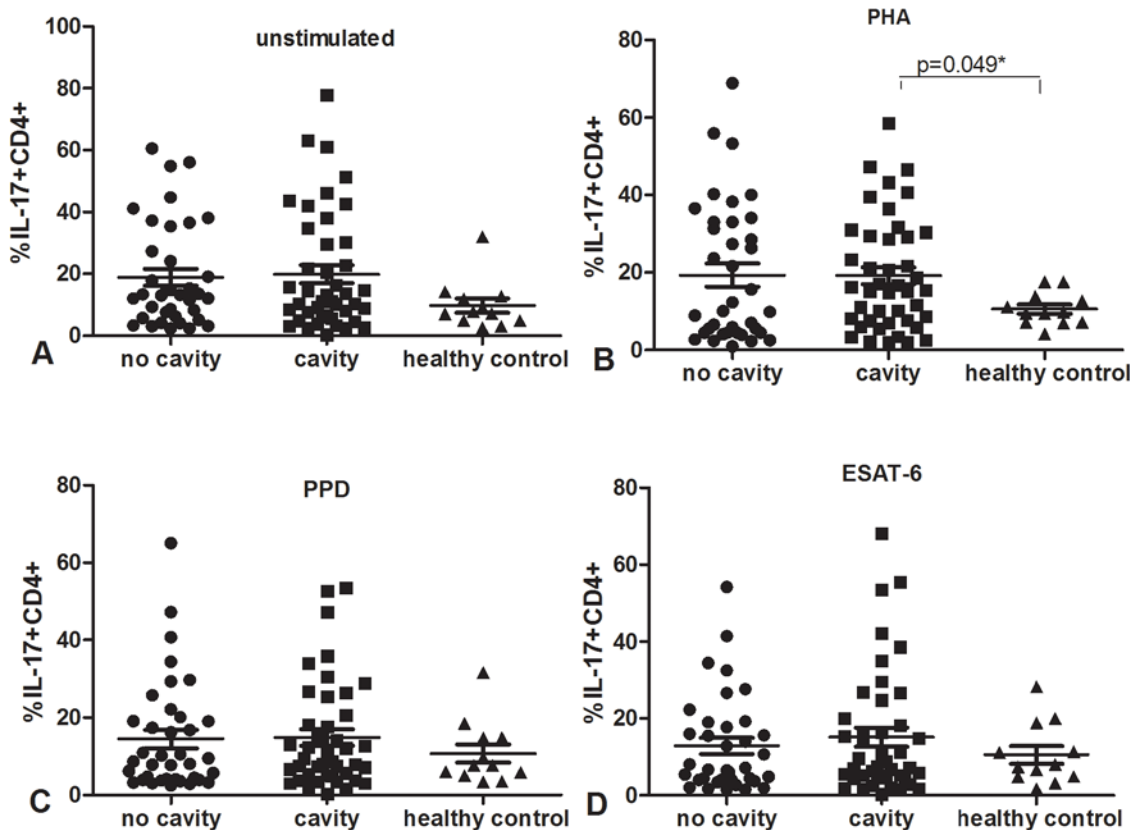

**Fig 4. Percentage of IL-17 secreting CD4+ T cells among cavitory and non-cavitory PTB as well as healthy controls, using cell staining and flow cytometry.** PMBC cultured with unstimulated (A), PHA(B), PPD(C) and ESAT-6(D).

doi:10.1371/journal.pone.0127087.g004

In supernatant stimulated by ESTA-6 and unstimulated, IL-17 secretions of non-cavitory PTB groups were significantly higher than those of healthy control group,  $p < 0.05$ . In PPD, ESAT-6 and PHA stimulation, IL-17 of cavitory PTB was slightly higher than that of non-cavitory PTB but there was no statistic significance as showed in Fig 2A–2D and Fig 2E showed the IL-17 change in different stimuli and different groups, there was no significant difference of IL-17 between PPD and ESAT-6 stimulation,  $p > 0.05$ .

### Similar percentages of Mtb antigen-specific IFN- $\gamma$ and IL-17 producing CD4+ T cells between cavitory and non-cavitory PTB

We stained cells for identification by flow cytometry, then tested the percentage of IFN- $\gamma$  and IL-17 producing CD4+ T cells after cell cultured and stimulated. The data was shown in Figs 3 and 4. The percentage of IFN- $\gamma$  producing CD4+ CD3+ cells after stimulation with PHA, PPD, ESAT-6 and medium alone was significantly higher in both active PTB groups than in healthy donors,  $p < 0.05$ . Furthermore, percentages of IFN- $\gamma$  producing CD4+ CD3+ cells were similar in cavitory and non-cavitory PTB after any stimulus, percentages of IL-17 producing CD4+ T cells were also similar among cavitory PTB, non-cavitory PTB and healthy controls ( $p > 0.05$ ) except that of cavity TB under PHA stimulation was higher than that of healthy donors,  $p$  was 0.049.



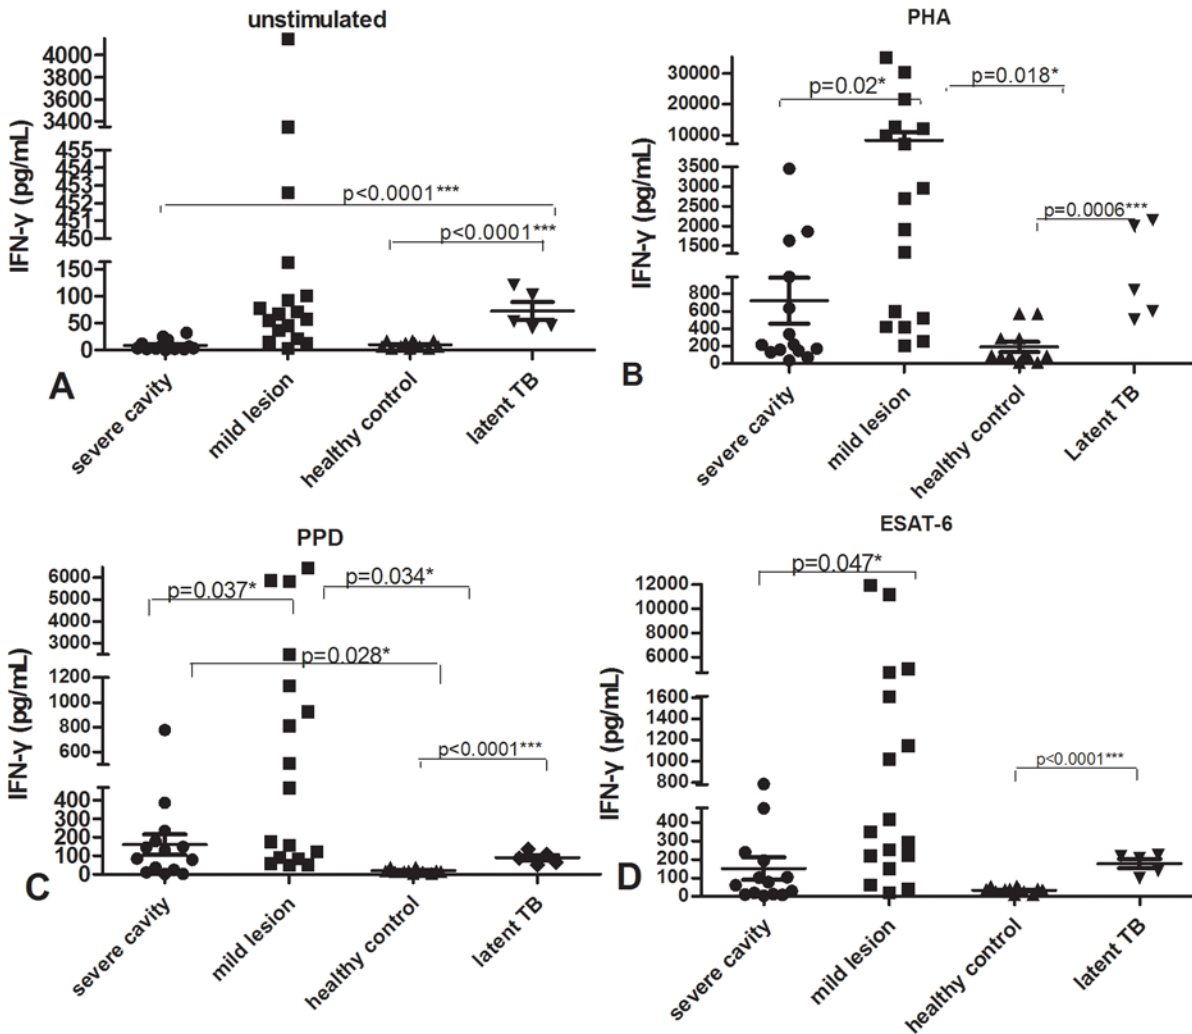

**Fig 5.** IFN- $\gamma$  secretion measured by ELISA in supernatant of PBMC cultured with unstimulated (A), PHA(B), PPD(C), ESAT-6(D) in severe cavity PTB group, mild lesion non-cavity PTB group, latent TB infection group and control donors.

doi:10.1371/journal.pone.0127087.g005

### Mtb antigen-specific IFN- $\gamma$ expression is decreased in PTB subjects with severe cavities

Since there were no significant differences in IFN- $\gamma$  and IL-17 levels or IFN- $\gamma$  and IL-17 producing CD4+ T cells between cavitory and non-cavitory PTB, we looked through all clinical characteristics of the subjects, then further subdivided the patients according to the diameter and number of cavities in cavitory PTB group and the field range of TB lesions on the chest CT in all patients. We discerned two subgroups (see [S1–S2 Figs](#)): the first subgroup (the severe cavity PTB group) included 14 cases, in which cavity diameter was > 3 cm or multiple (>3) cavities. The second subgroup (the mild non-cavity PTB group) included 17 cases, in which patients had mild lesions ( $\leq$  two lung fields) and had no cavity. The data ([Fig 5A–5D](#)) showed that the IFN- $\gamma$  produced in response to PHA, PPD, and ESAT-6 in the severe cavity PTB group was statistically reduced compared with that in the mild lesion non-cavity PTB group ( $p$  values all < 0.05). IFN- $\gamma$  stimulated by ESAT-6 and PHA in the severe cavity PTB group was as low as that in healthy controls and latent TB infection group ( $p > 0.05$ ),

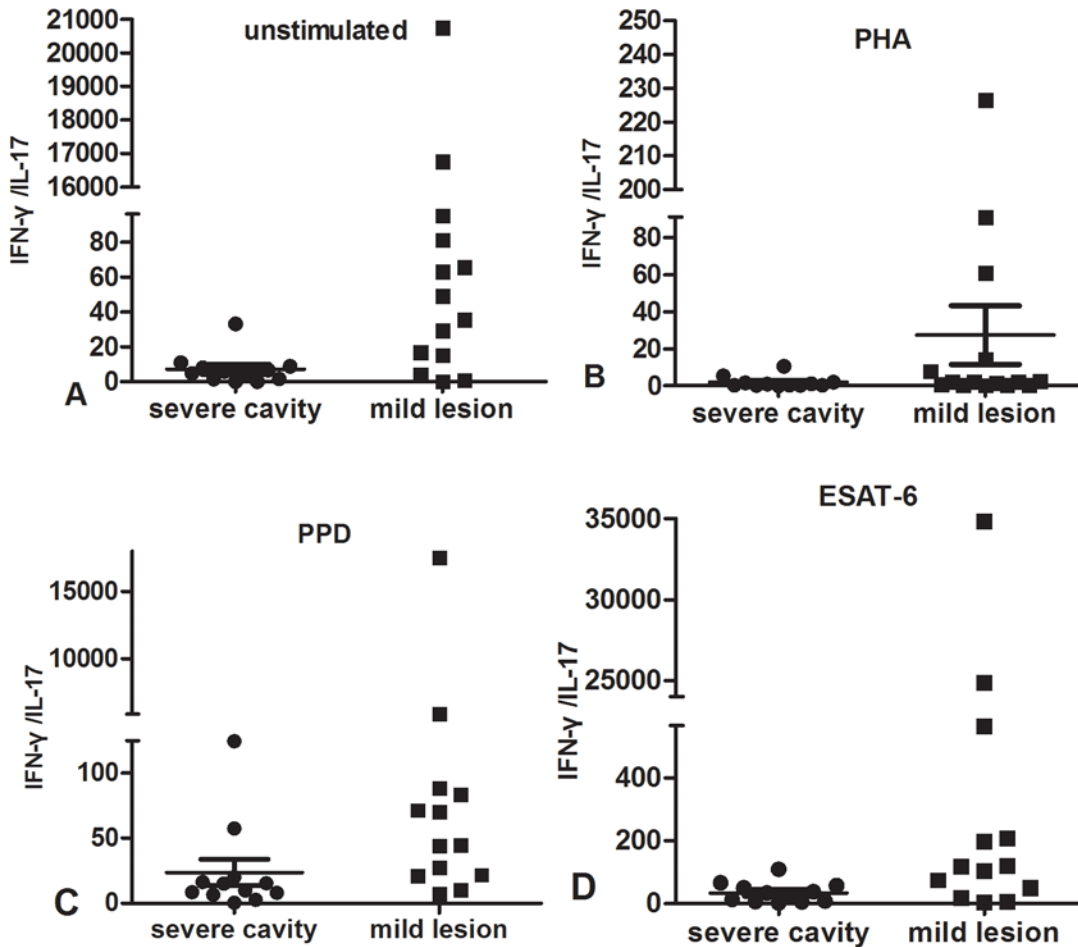

**Fig 6.** IFN- $\gamma$ /IL-17 measured by ELISA in supernatant of PBMC cultured with unstimulated (A), PHA(B), PPD(C), ESAT-6(D) in severe cavity PTB group and mild lesion non-cavity PTB groups.

doi:10.1371/journal.pone.0127087.g006

unstimulated IFN- $\gamma$  level in severe cavity PTB was even significantly lower than that of latent TB group ( $p < 0.0001$ ), possibly indicating that the IFN- $\gamma$ -producing T cells are impaired in the severe cavity group.

### Similar Mtb antigen-specific IL-17 and IFN- $\gamma$ /IL-17 between severe cavitory PTB and mild non-cavity PTB

Since we found much lower IFN- $\gamma$  responses in severe cavitory PTB subjects, we compared the differences of IL-17 responses to all stimuli between severe cavity and mild lesion non-cavity PTB. We measured similar levels of IL-17 in response to any stimuli between two groups ( $p > 0.05$ ). There was no significant different imbalance of IFN- $\gamma$ /IL-17 although IFN- $\gamma$  responses was impaired in severe cavity PTB, the data was showed in [Fig 6](#).

### Mtb antigen-specific CD3+ percentages are remarkably decreased in severe cavitory PTB

To further determine the potential reason for decreased IFN- $\gamma$  in response to PHA and MTB antigens in severe cavity PTB, we compared the percentages of CD3+, CD3+CD4+, and

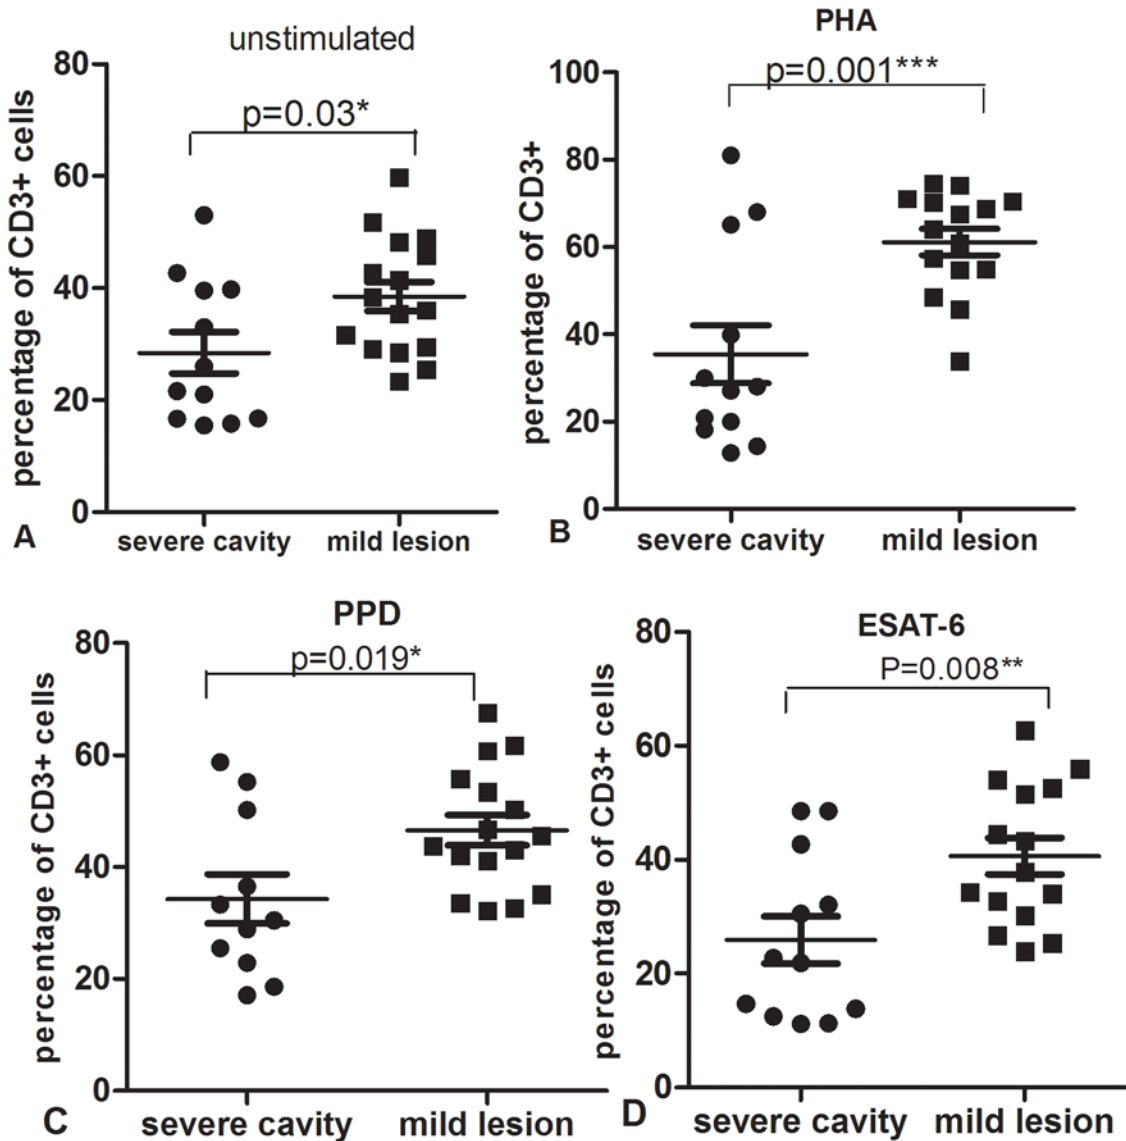

**Fig 7. Percentage of CD3+ cells from PBMC after culture with unstimulated (A), PHA(B), PPD(C) or ESAT-6(D) in severe cavity PTB group and mild lesion non-cavity PTB group.**

doi:10.1371/journal.pone.0127087.g007

CD3+CD8+ cells between two groups. The results were shown in Fig 7A–7D: the percentage of CD3+ cells in the severe cavity PTB group was much lower than in the mild lesion non-cavity PTB group, p values < 0.05. The plot images of percentages of CD3+ cells in two groups were shown in Figs 8 and 9. The decreased percentages of CD3+ cells in the severe cavity PTB group resulted in part from decreased CD3+CD4+ cells, rather than CD3+CD8+ T cells (p values < 0.05), data was shown in Fig 10A–10D. We also found significantly decreased PPD specific IFN- $\gamma$ <sup>+</sup>CD4<sup>+</sup> expression in severe cavity PTB patients (p<0.05). IFN- $\gamma$ <sup>+</sup>CD4<sup>+</sup> in response to ESAT-6 seemed like to be lower in severe cavity PTB but had no significant difference as shown in Fig 11, p>0.05.

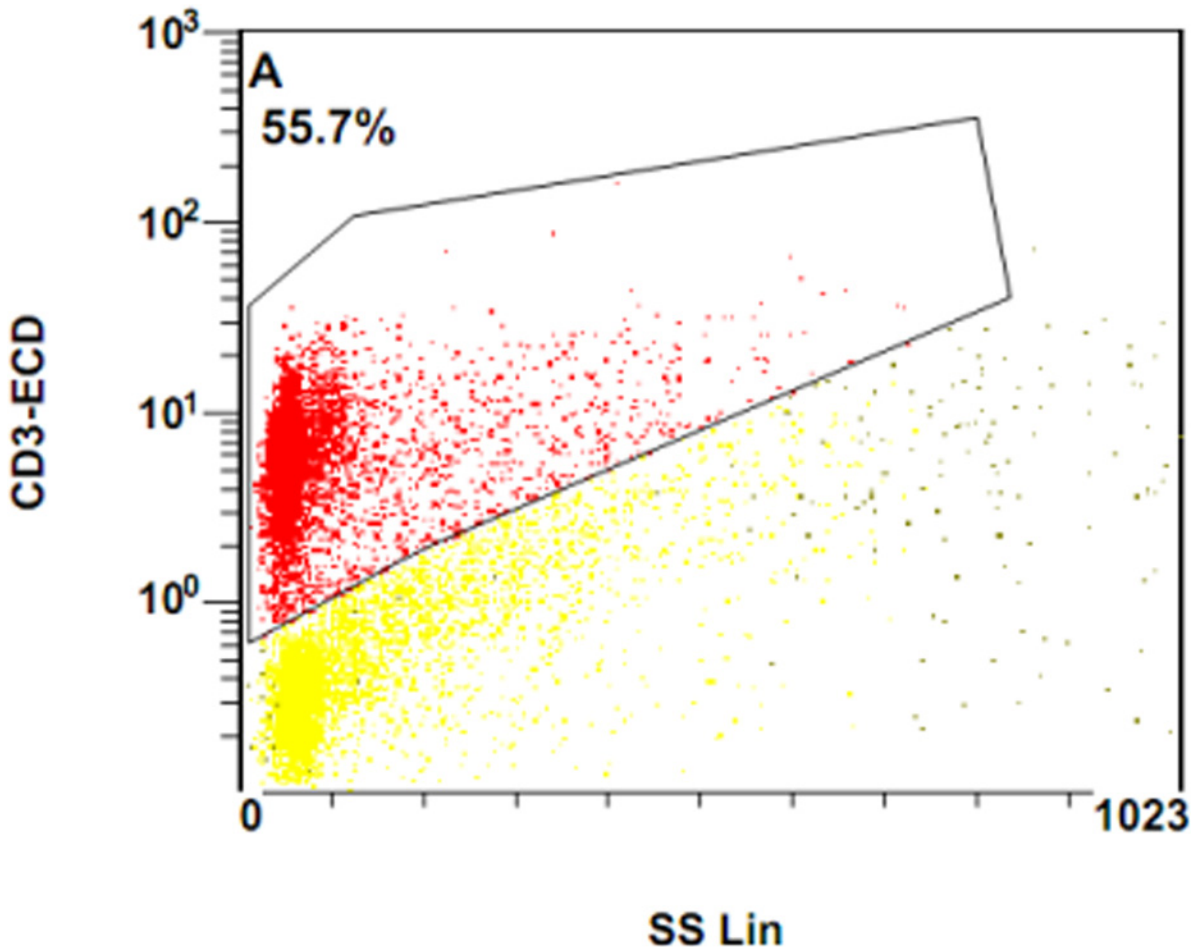

**Fig 8. Plot image of CD3-ECD in flow cytometry in severe cavitory PTB.**

doi:10.1371/journal.pone.0127087.g008

### IFN- $\gamma$ response changed and finally decreased with the severe cavity developed in lung of patient with PTB

We regrouped all the participants according to the severity of cavity and lesions in lungs, there were five grades for all patients, grade 1: healthy control; grade 2: no cavity and lesions  $\leq 2$  lung fields; grade 3: had cavity and cavity diameter  $\leq 2$  cm and lesions  $\leq 3$  lung fields; grade 4: 2 cm < cavity diameter  $\leq 3$  cm or cavity number < 3 or cavity diameter  $\leq 2$  cm but lesions > 3 lung fields; grade 5 cavity diameter > 3 cm or multiple cavities (cavity number  $\geq 3$ ) with any severity of lung lesions. A total of 70 TB patients and 12 healthy donors were satisfied with above grading condition. We found that health controls with grade 1 had lower IFN- $\gamma$  response to any stimuli, then IFN- $\gamma$  response increased markedly 12–50 fold in grade 2 of patients with PTB, IFN- $\gamma$  declined gradually about 20% in grade 3 and then slightly rose about 30% in grade 4, finally decreased 10–50 fold to be very low level in grade 5 which represented severe cavitory PTB, the change pattern of IFN- $\gamma$  with severe cavities of TB was shown in [Fig 12](#) in bar graph and [Fig 13](#) in line graph.

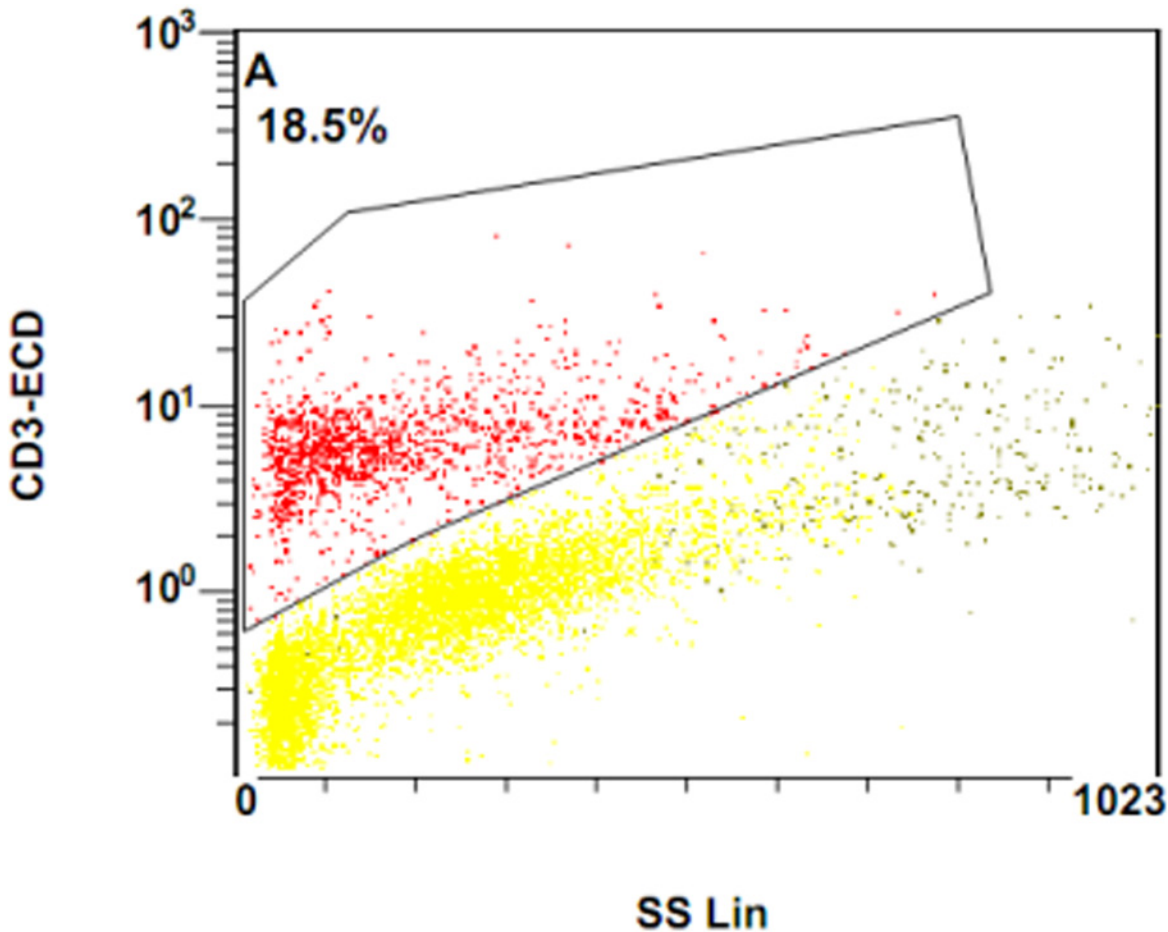

**Fig 9.** Plot image of CD3-ECD in flow cytometry in mild lesion non-cavity PTB(9).

doi:10.1371/journal.pone.0127087.g009

## Discussion

This study reported the wide variation of *M. tuberculosis* antigen-specific IFN- $\gamma$  and IL-17 responses in active PTB patients with the similarity in humans with latent TB infection shown in our previous study [21]. In the current study, *M. tuberculosis* antigen-specific IFN- $\gamma$  and IL-17 in PBMC from patients with active PTB was significantly increased compared to that from cells of healthy controls or donors (HD). However, we did not find statistic differences of IFN- $\gamma$  and IL-17 between cavity and non-cavity PTB groups.

For IL-17 expression in humans, we reviewed several published studies concerning IL-17 secretion in active TB patients. One study [23] reported that the proportion of IL-17 producing cells among lymphocytes was similar between TB patients and HD, but IL-17 producing cells in the gamma-delta T cell population were increased in PTB patients. Another study [24] found that *M. tuberculosis* induced IL-17 was markedly augmented in the blood of active PTB patients; moreover IL-17 expression in lymphocytes was higher in severe pulmonary lesions, reflecting the severity of lesions in the lungs. One recent study [25] showed that *ex vivo* PPD stimulation of PBMCs from patients with PTB did not significantly stimulate IL-17 release; rather, higher IL-17 was found in patients with infiltrative disease, in comparison with those affected with military and cavitory lesions. Our result implied some trend of increased IL-17

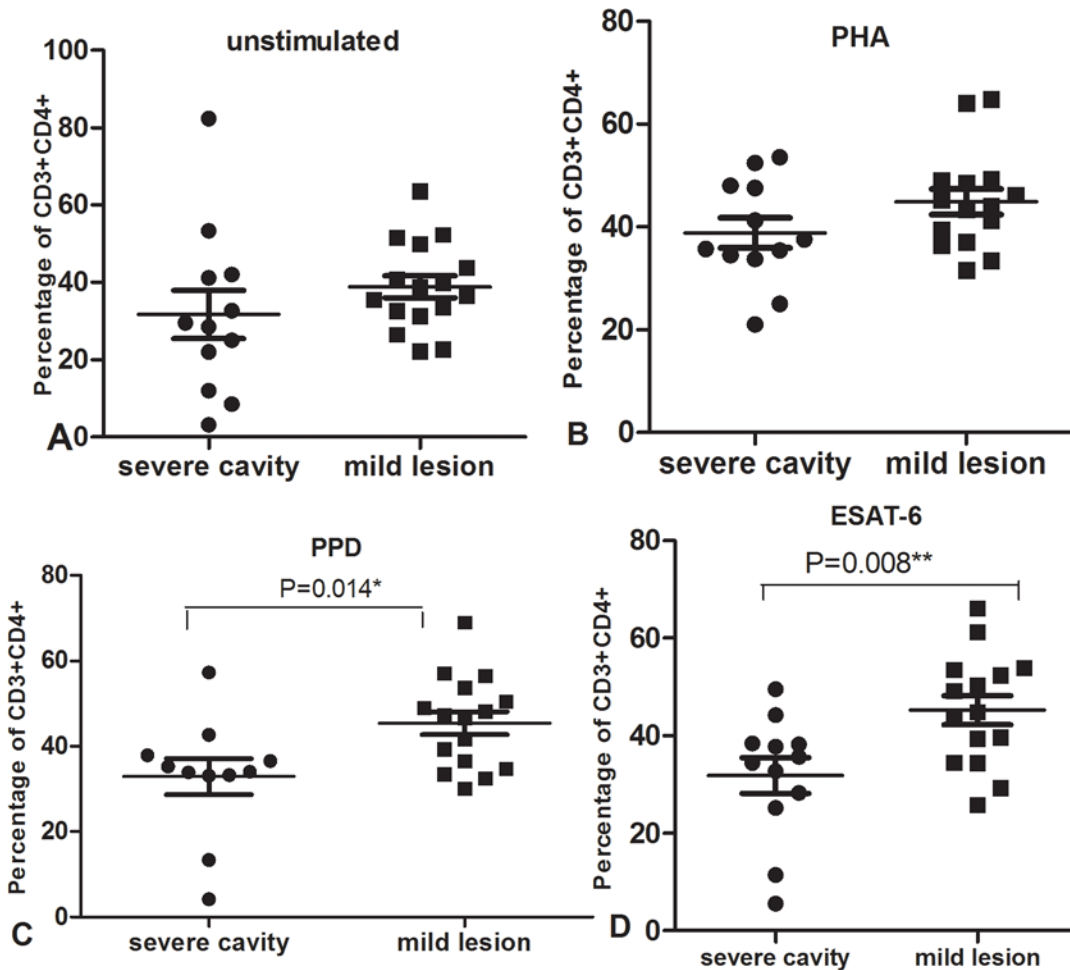

**Fig 10. Percentage of CD3+CD4+ cells from PBMC after culture with unstimulated (A), PHA(B), PPD(C) or ESAT-6(D) in severe cavity PTB group and mild lesion non-cavity PTB group.**

doi:10.1371/journal.pone.0127087.g010

secretion in PBMC from cavitory PTB which was partly consistent with the aforementioned study, although we did not observe a statistical difference between cavity and non-cavity TB.

After staining the cells, we found similar levels of IFN- $\gamma$  producing CD4+CD3+ cells between cavity and non-cavity PTB; both groups had statistically higher percentages of IFN- $\gamma$  producing CD4 T cells than HD. Through comparison of IL-17 levels in PBMC by ELISA and producing T cells by flow cytometry, we came to the conclusion that TB antigen-specific IL-17 secretion was not statistically increased in PBMC of active PTB.

Since we did not find any difference of levels in IFN- $\gamma$  and IL-17 secretion between cavity and non-cavity PTB, we looked through the detailed data from each patient because so much individual variation existed. Using chest CT imaging, we defined severe cavitory PTB by the presence of multiple cavities ( $\geq 3$ ) or a cavity diameter of more than 3 cm, while mild non-cavitory PTB was defined as non-cavity TB with less than two lung fields of lesions. We found that IFN- $\gamma$  in response to PHA and TB antigens in severe cavitory PTB patients was statistically lower than that in patients with mild lesions of non-cavity PTB. When we further analyzed the staining data, significantly decreased CD3+ percentage in severe cavitory PTB compared to that in mild lesion non-cavity PTB also was observed. In addition, the decrease in CD3+ T cells resulted from a reduction in CD3+CD4+ cells, rather than in CD3+CD8+ cells.

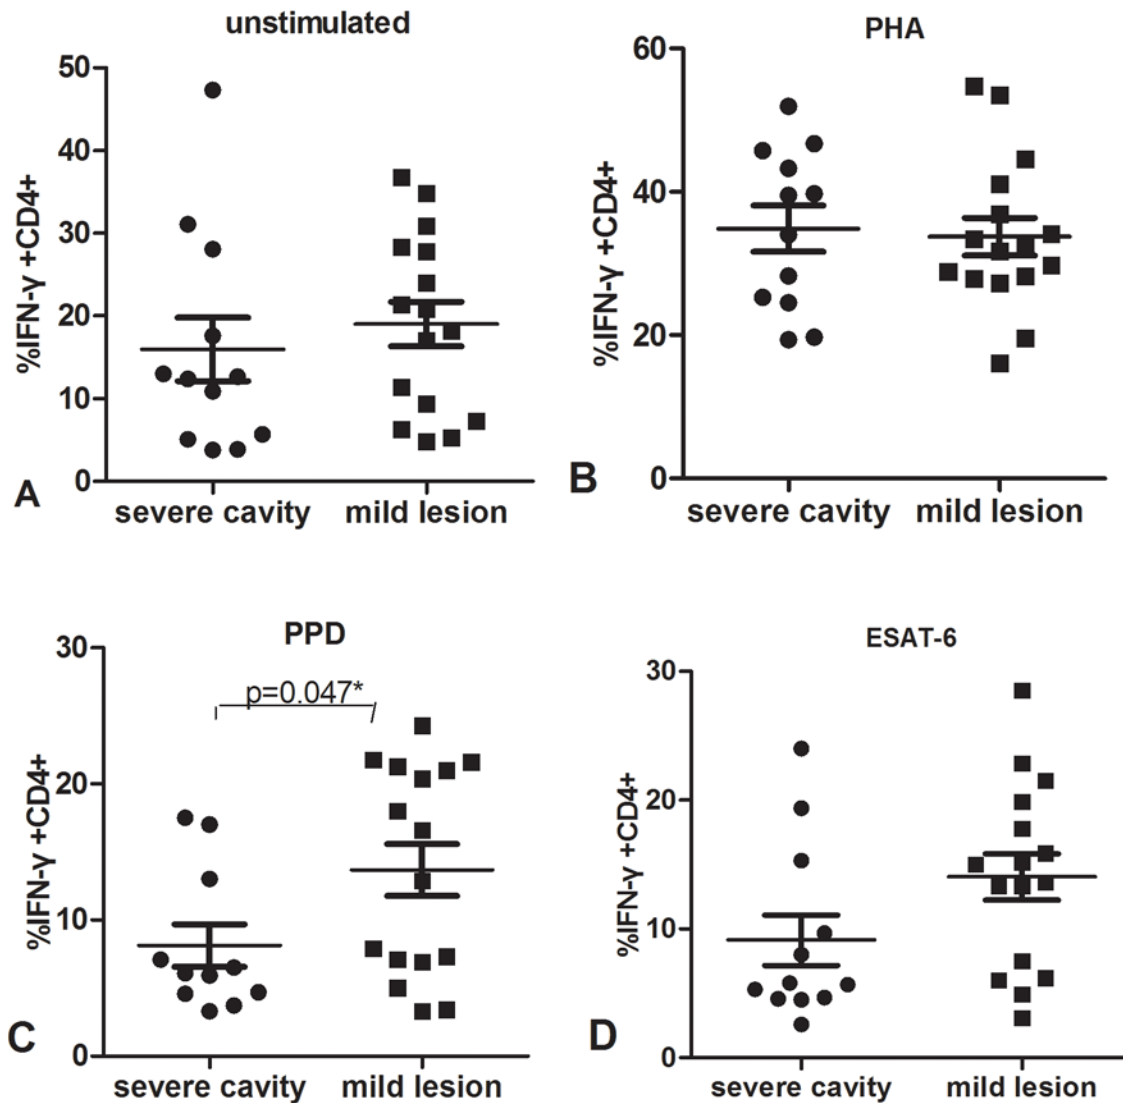

**Fig 11. Percentage of IFN- $\gamma$ + CD4+ T cells from PBMC after culture with unstimulated (A), PHA(B), PPD(C) or ESAT-6(D) in severe cavity PTB groups and mild lesion non-cavity PTB group.**

doi:10.1371/journal.pone.0127087.g011

To further elucidate and expose the relationship of IFN- $\gamma$  response and the severity of cavity of TB in lungs, we graded the enrolled participants as grade 1–5 according to the severity of cavity and pulmonary lesions. IFN- $\gamma$  in response to any stimuli increased dramatically in grade 2 represented PTB subjects compared to the level of grade 1 which represented healthy control, then slowly went down in grade 3 and slowly went up in grade 4, finally decreased to the very low level which was almost as low as that in healthy control shown in Fig 10, this figure of change trend further demonstrated that IFN- $\gamma$  depression in PBMC of PTB was associated with cavitory severity of TB, the decreased and very low IFN- $\gamma$  response will be observed when PTB develops to severe cavities.

Barry, et al [11] demonstrated impaired antigen-specific CD4+ T lymphocytes in cavitory tuberculosis, and other studies [26,27] also reported impaired antigen specific IFN- $\gamma$  in cavitory tuberculosis, but no one made the stratification analysis for cavitory PTB by number and diameter of cavities, their numbers of participants enrolled were much lower than current study. At

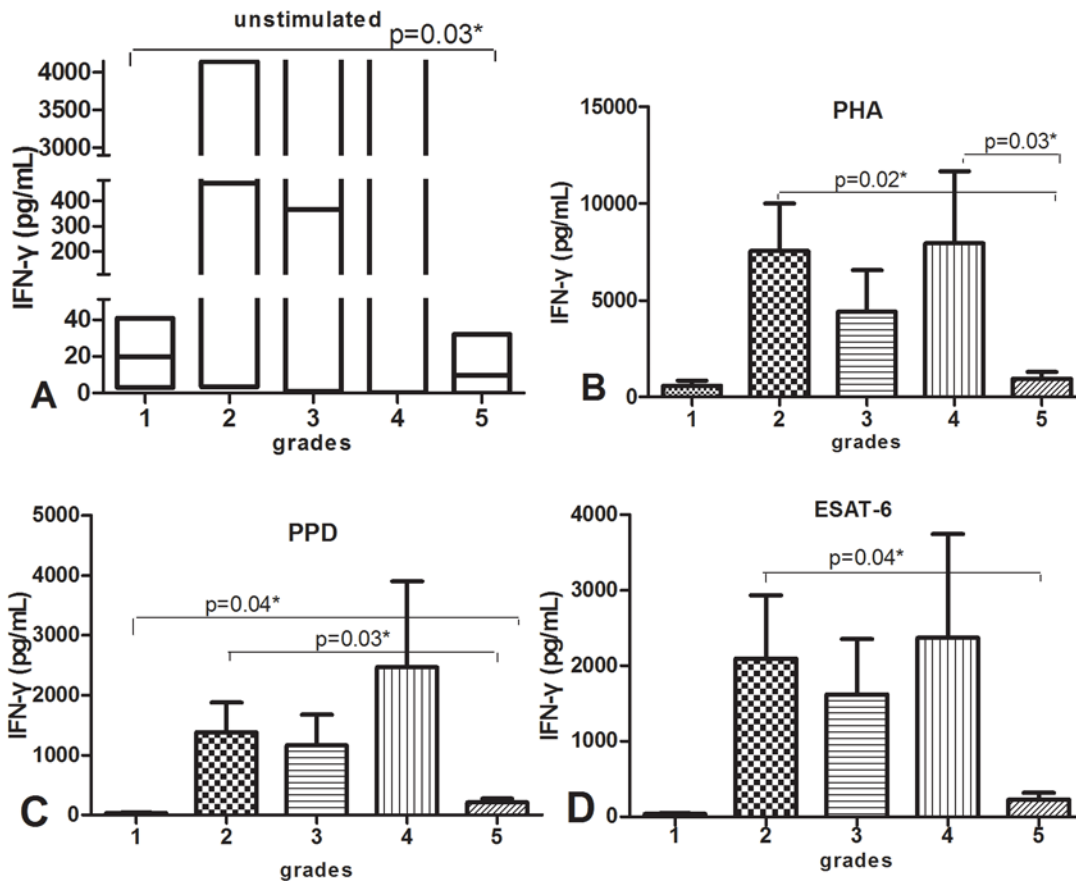

**Fig 12.** Shown in histogram, IFN- $\gamma$  secretion by ELISA in supernatant of PBMC stimulated with medium (unstimulated, A), PHA(B), PPD(C) or ESAT-6(D) in five grades of subjects, p value refers to comparison of IFN- $\gamma$  levels.

doi:10.1371/journal.pone.0127087.g012

the site of infection, the proliferation reaction and immune response were also weaker in cavitory tuberculosis as reported by two studies [28, 29].

To explain our study results, we postulate several mechanisms to explain the decreased CD3+ percentage in PBMC of severe cavitory PTB after restimulation with *M. tb* antigens *in vitro*. Firstly, CD3+ T cells might manifest weak viability as a decreased percentage of CD3+ cells, as observed in cultivation with PHA, which is a non-specific polyclonal stimulant of T cells. Excessive apoptosis might occur in CD3+ T cells during the course of contact between antigens and cells [30], as recent studies showed increased apoptosis in active PTB. Using PD-1 and its ligands as indicators of measurement, a higher percentage of apoptotic T cells and CD4 lymphocytes in children with acute phase central nervous tuberculosis has been observed [31,32]. Secondly, the decreased percentage of CD3+ T cells might have been due to excess accumulation of neutrophils in severe cavitory PTB[11,33], because previous studies [34] had pointed out that accumulation of neutrophils was detrimental to the host and associated with loss of IFN- $\gamma$  responsiveness. We did not measure neutrophil numbers in this study so this possibility needs to be verified in future research. Thirdly, we are not able to tell whether there are altered immune responses at the site of TB infection because we failed to separate large numbers of cells from Bronchoalveolar lavage fluid (BALF) of active PTB. BALF might contain excess IL-17 and neutrophils in severely cavitory PTB, which may have different proportions of cells compared with mild lesion non-cavity PTB. That was a weakness of this study. We need



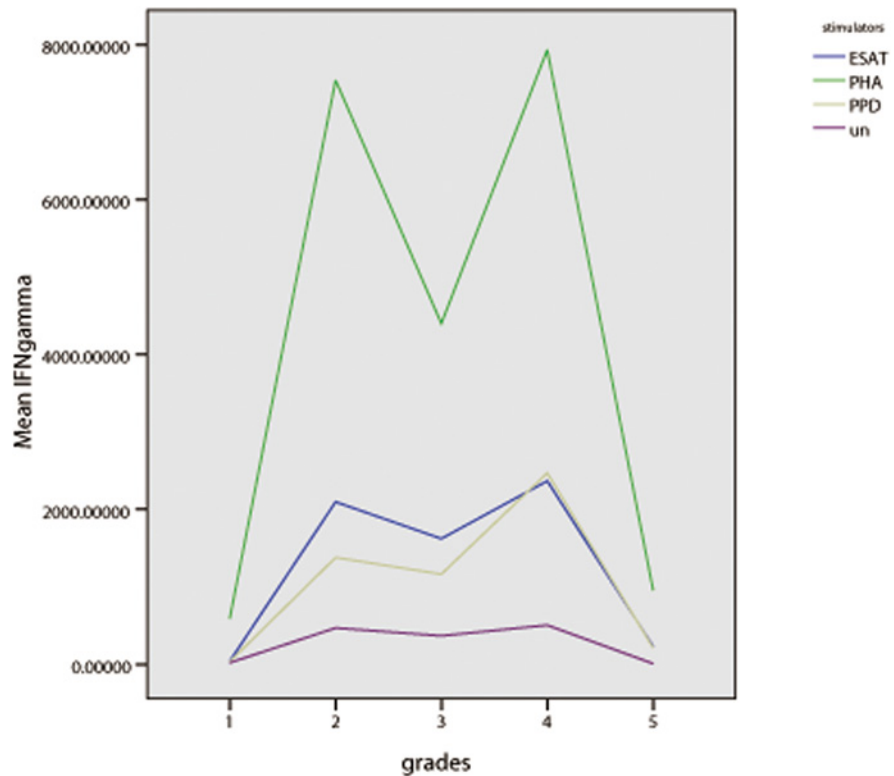

**Fig 13. Shown in line graph, mean IFN- $\gamma$  concentration in different groups of PBMC cultured with unstimulated, PHA, PPD and ESAT-6, horizontal axis represents different grades of patients, vertical axis represents mean IFN- $\gamma$  secretion of PBMC.** Grades represent cavitory severity of TB: 1 healthy controls; 2 no cavity and lesions  $\leq 2$  lung fields; 3 cavity diameter  $\leq 2$ cm and lesions  $\leq 3$  lung fields; 4 2 cm < cavity diameter  $\leq 3$ cm or cavity diameter  $\leq 2$ cm and lesions > 3 lung fields; 5 cavity diameter >3 cm or multiple cavities (cavity number  $\geq 3$ ).

doi:10.1371/journal.pone.0127087.g013

to further measure and analyse additional immune responses (Th1, Th2, Th17, Treg) and interactions between lymphocytes, neutrophils and DC cells. Treg populations would be possibly involved with the loss of Ag-specific IFN- $\gamma$  in severe cavities PTB and might also support the immune disruption that occurs.

In summary, the wide range of IFN- $\gamma$  in active PTB patients was observed. IFN- $\gamma$  and IL-17 secretion were similar ex vivo between cavitory PTB and non-cavitory PTB, and IL-17 seemed to have no association with cavities in blood of active PTB. The IFN- $\gamma$  response increased greatly at the mild stage of PTB, then changed with the progress of the lesions and finally dropped to very low level when lesions make progress to be at stage with severe cavities. We demonstrate that M.tuberculosis antigen-specific Th1 response is impaired when PTB lesions develop to severe cavities.

### Supporting Information

**S1 Fig. Chest CT image in severe cavitory PTB, large cavity 7.5cm in diameter in left upper lobe marked by a white arrow.**

(TIF)

**S2 Fig. Chest CT image in mild lesion non-cavitory PTB, mild lesion without cavity confined to posterior segment of left upper lobe marked by a white arrow.**

(TIF)

## Acknowledgments

We thank Professor Ying Wang in the Shanghai Institute of Immunology in Shanghai Jiao-Tong University School of Medicine who kindly presented ESAT-6 for this experiment

## Author Contributions

Conceived and designed the experiments: LF ZH JE HX. Performed the experiments: LF GM BS. Analyzed the data: LF JE. Contributed reagents/materials/analysis tools: ZH. Wrote the paper: LF.

## References

1. Eurosurveillance editorial team. WHO publishes Global tuberculosis report 2013. *Euro Surveill.* 2013;18. pii: 20615.
2. Wallis RS, Pai M, Menzies D, Doherty TM, Walzl G, Perkins MD, et al. Biomarkers and diagnostics for tuberculosis: progress, needs, and translation into practice. *Lancet.* 2010; 375:1920–1937. doi: [10.1016/S0140-6736\(10\)60359-5](https://doi.org/10.1016/S0140-6736(10)60359-5) PMID: [20488517](https://pubmed.ncbi.nlm.nih.gov/20488517/)
3. Geldmacher C, Zumla A, Hoelscher M. Interaction between HIV and Mycobacterium tuberculosis: HIV-1-induced CD4 T-cell depletion and the development of active tuberculosis. *Curr Opin HIV AIDS.* 2012; 7:268–275. doi: [10.1097/COH.0b013e3283524e32](https://doi.org/10.1097/COH.0b013e3283524e32) PMID: [22495739](https://pubmed.ncbi.nlm.nih.gov/22495739/)
4. Geldmacher C, Ngwenyama N, Schuetz A, Petrovas C, Reither K, Heeregrave EJ, et al. Preferential infection and depletion of Mycobacterium tuberculosis-specific CD4 T cells after HIV-1 infection. *J Exp Med.* 2010; 207:2869–2881. doi: [10.1084/jem.20100090](https://doi.org/10.1084/jem.20100090) PMID: [21115690](https://pubmed.ncbi.nlm.nih.gov/21115690/)
5. Kwan CK, Ernst JD. HIV and tuberculosis: a deadly human syndemic. *Clinical microbiology reviews.* 2011; 24: 351–376. doi: [10.1128/CMR.00042-10](https://doi.org/10.1128/CMR.00042-10) PMID: [21482729](https://pubmed.ncbi.nlm.nih.gov/21482729/)
6. Lawn SD, Myer L, Edwards D, Bekker LG, Wood R. Short-term and long-term risk of tuberculosis associated with CD4 cell recovery during antiretroviral therapy in South Africa. *AIDS.* 2009; 23: 1717–1725. doi: [10.1097/QAD.0b013e32832d3b6d](https://doi.org/10.1097/QAD.0b013e32832d3b6d) PMID: [19461502](https://pubmed.ncbi.nlm.nih.gov/19461502/)
7. Dorhoi A, Reece ST, Kaufmann SH. For better or for worse: the immune response against Mycobacterium tuberculosis balances pathology and protection. *Immunological reviews.* 2011; 240: 235–251. doi: [10.1111/j.1600-065X.2010.00994.x](https://doi.org/10.1111/j.1600-065X.2010.00994.x) PMID: [21349097](https://pubmed.ncbi.nlm.nih.gov/21349097/)
8. Saunders BM, Britton WJ. Life and death in the granuloma: immunopathology of tuberculosis. *Immunology and cell biology.* 2007; 85: 103–111. PMID: [17213830](https://pubmed.ncbi.nlm.nih.gov/17213830/)
9. Mukadi Y, Perriens JH, St Louis ME, Brown C, Prignot J, Willame JC, et al. Spectrum of immunodeficiency in HIV-1-infected patients with pulmonary tuberculosis in Zaire. *Lancet.* 1993; 342:143–146. PMID: [8101257](https://pubmed.ncbi.nlm.nih.gov/8101257/)
10. Mazzarella G, Bianco A, Perna F, D'Auria D, Grella E, Moscariello E, et al. T lymphocyte phenotypic profile in lung segments affected by cavitory and non-cavitory tuberculosis. *Clin Exp Immunol.* 2003; 132:283–288. PMID: [12699418](https://pubmed.ncbi.nlm.nih.gov/12699418/)
11. Barry S, Breen R, Lipman M, Johnson M, Janossy G. Tuberculosis (Edinb). 2009; 89:48–53. doi: [10.1016/j.tube.2008.07.002](https://doi.org/10.1016/j.tube.2008.07.002) PMID: [18799355](https://pubmed.ncbi.nlm.nih.gov/18799355/)
12. Desvignes L, Ernst JD. Interferon-gamma-responsive nonhematopoietic cells regulate the immune response to Mycobacterium tuberculosis. *Immunity.* 2009; 31:974–985. doi: [10.1016/j.immuni.2009.10.007](https://doi.org/10.1016/j.immuni.2009.10.007) PMID: [20064452](https://pubmed.ncbi.nlm.nih.gov/20064452/)
13. Ghoreschi K, Laurence A, Yang XP, Tato CM, McGeachy MJ, Konkel JE, et al. Generation of pathogenic T(H)17 cells in the absence of TGF- $\beta$  signalling. *Nature.* 2010; 467:967–971. doi: [10.1038/nature09447](https://doi.org/10.1038/nature09447) PMID: [20962846](https://pubmed.ncbi.nlm.nih.gov/20962846/)
14. Wozniak TM, Saunders BM, Ryan AA, Britton WJ. Mycobacterium bovis BCG-specific Th17 cells confer partial protection against Mycobacterium tuberculosis infection in the absence of gamma infection. *Infection and Immunity.* 2010; 78:4187–4194. doi: [10.1128/IAI.01392-09](https://doi.org/10.1128/IAI.01392-09) PMID: [20679438](https://pubmed.ncbi.nlm.nih.gov/20679438/)
15. Umemura M, Yahagi A, Hamada S, Begum MD, Watanabe H, Kawakami K, et al. IL-17-mediated regulation of innate and acquired immune response against pulmonary Mycobacterium bovis bacille Calmette-Guerin infection. *J Immunol.* 2007; 178:3786–3796. PMID: [17339477](https://pubmed.ncbi.nlm.nih.gov/17339477/)
16. Okamoto Yoshida Y, Umemura M, Yahagi A, O'Brien RL, Ikuta K, Kishihara K, et al. Essential role of IL-17A in the formation of a mycobacterial infection-induced granuloma in the lung. *J Immunol.* 2010; 184:4414–4422. doi: [10.4049/jimmunol.0903332](https://doi.org/10.4049/jimmunol.0903332) PMID: [20212094](https://pubmed.ncbi.nlm.nih.gov/20212094/)

17. Cruz A, Fraga AG, Fountain JJ, Rangel-Moreno J, Torrado E, Saraiva M, et al. Pathological role of interleukin 17 in mice subjected to repeated BCG vaccination after infection with *Mycobacterium tuberculosis*. *J Exp Med*. 2010; 207:1609–1616. doi: [10.1084/jem.20100265](https://doi.org/10.1084/jem.20100265) PMID: [20624887](https://pubmed.ncbi.nlm.nih.gov/20624887/)
18. Green AM, Difazio R, Flynn JL. IFN- $\gamma$  from CD4 T cells is essential for host survival and enhances CD8 T cell function during *Mycobacterium tuberculosis* infection. *J Immunol*. 2013; 190:270–277. doi: [10.4049/jimmunol.1200061](https://doi.org/10.4049/jimmunol.1200061) PMID: [23233724](https://pubmed.ncbi.nlm.nih.gov/23233724/)
19. Caruso AM, Serbina N, Klein E, Triebold K, Bloom BR, Flynn JL. Mice deficient in CD4 T cells have only transiently diminished levels of IFN-gamma, yet succumb to tuberculosis. *J Immunol*. 1999; 162:5407–5416. PMID: [10228018](https://pubmed.ncbi.nlm.nih.gov/10228018/)
20. Lyadova IV, Vordermeier HM, Eruslanov EB, Khaidukov SV, Apt AS, Hewinson RG. Intranasal BCG vaccination protects BALB/c mice against virulent *Mycobacterium bovis* and accelerates production of IFN-gamma in their lungs. *Clin Exp Immunol*, 2001; 126:274–279. PMID: [11703371](https://pubmed.ncbi.nlm.nih.gov/11703371/)
21. Fan L, Xiao HP, Hu ZY, Ernst JD. Variation of *Mycobacterium tuberculosis* antigen-specific IFN- $\gamma$  and IL-17 responses in healthy tuberculin skin test (TST)-positive human subjects. *PLoS One*. 2012; 7: e42716. doi: [10.1371/journal.pone.0042716](https://doi.org/10.1371/journal.pone.0042716) PMID: [22880090](https://pubmed.ncbi.nlm.nih.gov/22880090/)
22. Kübler A, Luna B, Larsson C, Ammerman NC, Andrade BB, Orandle M, et al. *Mycobacterium tuberculosis* dysregulates MMP/TIMP balance to drive rapid cavitation and unrestrained bacterial proliferation. *J Pathol*. 2015; 235:431–444. doi: [10.1002/path.4432](https://doi.org/10.1002/path.4432) PMID: [25186281](https://pubmed.ncbi.nlm.nih.gov/25186281/)
23. Peng MY, Wang ZH, Yao CY, Jiang LN, Jin QL, Wang J, et al. Interleukin 17-producing gamma delta T cells increased in patients with active pulmonary tuberculosis. *Cell Mol Immunol*. 2008; 5:203–208. doi: [10.1038/cmi.2008.25](https://doi.org/10.1038/cmi.2008.25) PMID: [18582402](https://pubmed.ncbi.nlm.nih.gov/18582402/)
24. Jurado JO, Pasquinelli V, Alvarez IB, Peña D, Rovetta AI, Tateosian NL, et al. IL-17 and IFN- $\gamma$  expression in lymphocytes from patients with active tuberculosis correlates with the severity of the disease. *J Leukoc Biol*. 2012; 91:991–1002. doi: [10.1189/jlb.1211619](https://doi.org/10.1189/jlb.1211619) PMID: [22416258](https://pubmed.ncbi.nlm.nih.gov/22416258/)
25. Nunnari G, Pinzone MR, Vancheri C, Palermo F, Cacopardo B. Interferon- $\gamma$  and interleukin-17 production from PPD-stimulated PBMCs of patients with pulmonary tuberculosis. *Clin Invest Med*. 2013; 36: E64–71. PMID: [23544607](https://pubmed.ncbi.nlm.nih.gov/23544607/)
26. Rodríguez-Güell E, Agustí G, Corominas M, Luquin M, Julián E. Impaired gamma interferon response to *Mycobacterium vaccae* antigens in patients with cavitory pulmonary tuberculosis. *Clin Vaccine Immunol*. 2008; 15:1485–1488. doi: [10.1128/CVI.00131-08](https://doi.org/10.1128/CVI.00131-08) PMID: [18596204](https://pubmed.ncbi.nlm.nih.gov/18596204/)
27. Wu HP, Hua CC, Chuang DY. Decreased in vitro interferon-gamma production in patients with cavitory tuberculosis on chest radiography. *Respir Med*. 2007; 101:48–52. PMID: [16753289](https://pubmed.ncbi.nlm.nih.gov/16753289/)
28. Kaplan G, Post FA, Moreira AL, Wainwright H, Kreiswirth BN, Tanverdi M, et al. *Mycobacterium tuberculosis* growth at the cavity surface: a microenvironment with failed immunity. *Infect Immun*. 2003; 71:7099–7108. PMID: [14638800](https://pubmed.ncbi.nlm.nih.gov/14638800/)
29. Ulrichs T, Kosmiadi GA, Jörg S, Pradi L, Titukhina M, Mishenko V, et al. Differential organization of the local immune response in patients with active cavitory tuberculosis or with nonprogressive tuberculosis. *J Infect Dis*. 2005; 192:89–97. PMID: [15942898](https://pubmed.ncbi.nlm.nih.gov/15942898/)
30. Divangahi M, Desjardins D, Nunes-Alves C, Remold HG, Behar SM. Eicosanoid pathways regulate adaptive immunity to *Mycobacterium tuberculosis*. *Nat Immunol*. 2010; 11:751–758. doi: [10.1038/ni.1904](https://doi.org/10.1038/ni.1904) PMID: [20622882](https://pubmed.ncbi.nlm.nih.gov/20622882/)
31. Singh A, Mohan A, Dey AB, Mitra DK. Inhibiting the Programmed Death 1 Pathway Rescues *Mycobacterium tuberculosis*-Specific Interferon  $\gamma$ -Producing T Cells From Apoptosis in Patients with Pulmonary Tuberculosis. *J Infect Dis*. 2013; 208:603–615. doi: [10.1093/infdis/jit206](https://doi.org/10.1093/infdis/jit206) PMID: [23661793](https://pubmed.ncbi.nlm.nih.gov/23661793/)
32. Di Carlo P, Casuccio A, Romano A, Spicola D, Titone L, Caccamo N, et al. Lymphocyte apoptosis in children with central nervous system tuberculosis: a case control study. *BMC Pediatr*. 2011; 11:108. doi: [10.1186/1471-2431-11-108](https://doi.org/10.1186/1471-2431-11-108) PMID: [22111973](https://pubmed.ncbi.nlm.nih.gov/22111973/)
33. Condos R, Rom WN, Liu YM, Schluger NW. Local immune responses correlate with presentation and outcome in tuberculosis. *Am J Respir Crit Care Med*. 1998; 157(3 Pt 1):729–735. PMID: [9517583](https://pubmed.ncbi.nlm.nih.gov/9517583/)
34. Nandi B, Behar SM. Regulation of neutrophils by interferon- $\gamma$  limits lung inflammation during tuberculosis infection. *J Exp Med*. 2011; 208:2251–2262. doi: [10.1084/jem.20110919](https://doi.org/10.1084/jem.20110919) PMID: [21967766](https://pubmed.ncbi.nlm.nih.gov/21967766/)
